# Supplementary material for: Biological data annotation via a human-augmenting AI-based labeling system
Source: PubMed Central journal article supplement (PMC8497580; doi:10.1038/s41746-021-00520-6), 2021-10-07
Supplement: 41746_2021_520_MOESM1_ESM.pdf [file 41746_2021_520_MOESM1_ESM.pdf]

|           | TIL |     |     | Tumor |     |     | Eosinophils |     |     | Ki67 |     |     |
|-----------|-----|-----|-----|-------|-----|-----|-------------|-----|-----|------|-----|-----|
| Annotator | P   | N   | T   | P     | N   | T   | P           | N   | T   | P    | N   | T   |
| 1         | 87  | 104 | 191 | 114   | 74  | 188 | 115         | 98  | 213 | 90   | 117 | 207 |
| 2         | 92  | 123 | 215 | 86    | 114 | 200 | 88          | 117 | 205 | 91   | 96  | 187 |
| 3         | 99  | 97  | 196 | 93    | 114 | 207 | 106         | 104 | 210 | 82   | 121 | 203 |
| 4         | 115 | 92  | 207 | 101   | 91  | 192 | 105         | 105 | 210 | 89   | 121 | 210 |
| 5         | 109 | 104 | 213 | 96    | 107 | 203 | 112         | 78  | 190 | 108  | 104 | 212 |
| 6         | 118 | 78  | 196 | 101   | 103 | 204 | 114         | 75  | 189 | 95   | 104 | 199 |
| 7         | 90  | 123 | 213 | 85    | 128 | 213 | 94          | 99  | 193 | 89   | 110 | 199 |

**Supplementary Figure 1. Workload Experiment Object Counts.** The number of positive (columns “P”), negative (columns “N”), and total (columns “T”) examples for each use-case and annotator during the workload experiments.
